# Supplementary material
Source: publisher figshare collection journal article supplement (https://karger.figshare.com/ndownloader/files/13169897)

# **Circular RNA Expression in the Brain of a Neonatal Rat Model of Periventricular White Matter Damage**

Lihua Zhu<sup>a</sup> Ruibin Zhao<sup>b</sup> Li Huang<sup>c</sup> Sisi Mo<sup>c</sup> Zhangbin Yu<sup>d</sup> Li Jiang<sup>c</sup>  
Lixing Qiao<sup>c</sup>

<sup>a</sup>Institute of clinical, Jiangsu Health Vocational College, Nanjing, <sup>b</sup>Department of Pediatrics, Nanjing General Hospital, Nanjing, <sup>c</sup>Department of pediatrics, Zhongda hospital, Southeast University, District, Nanjing, <sup>d</sup>Department of Pediatrics, Nanjing Maternity and Child Health Care Hospital, Nanjing Medical University, Nanjing, China

Figure S1. The circRNA-miRNA-mRNA network. A oval node represents circRNAs, a round node represents mRNAs, a triangles node represents miRNAs, and their relationships are represented by lines.

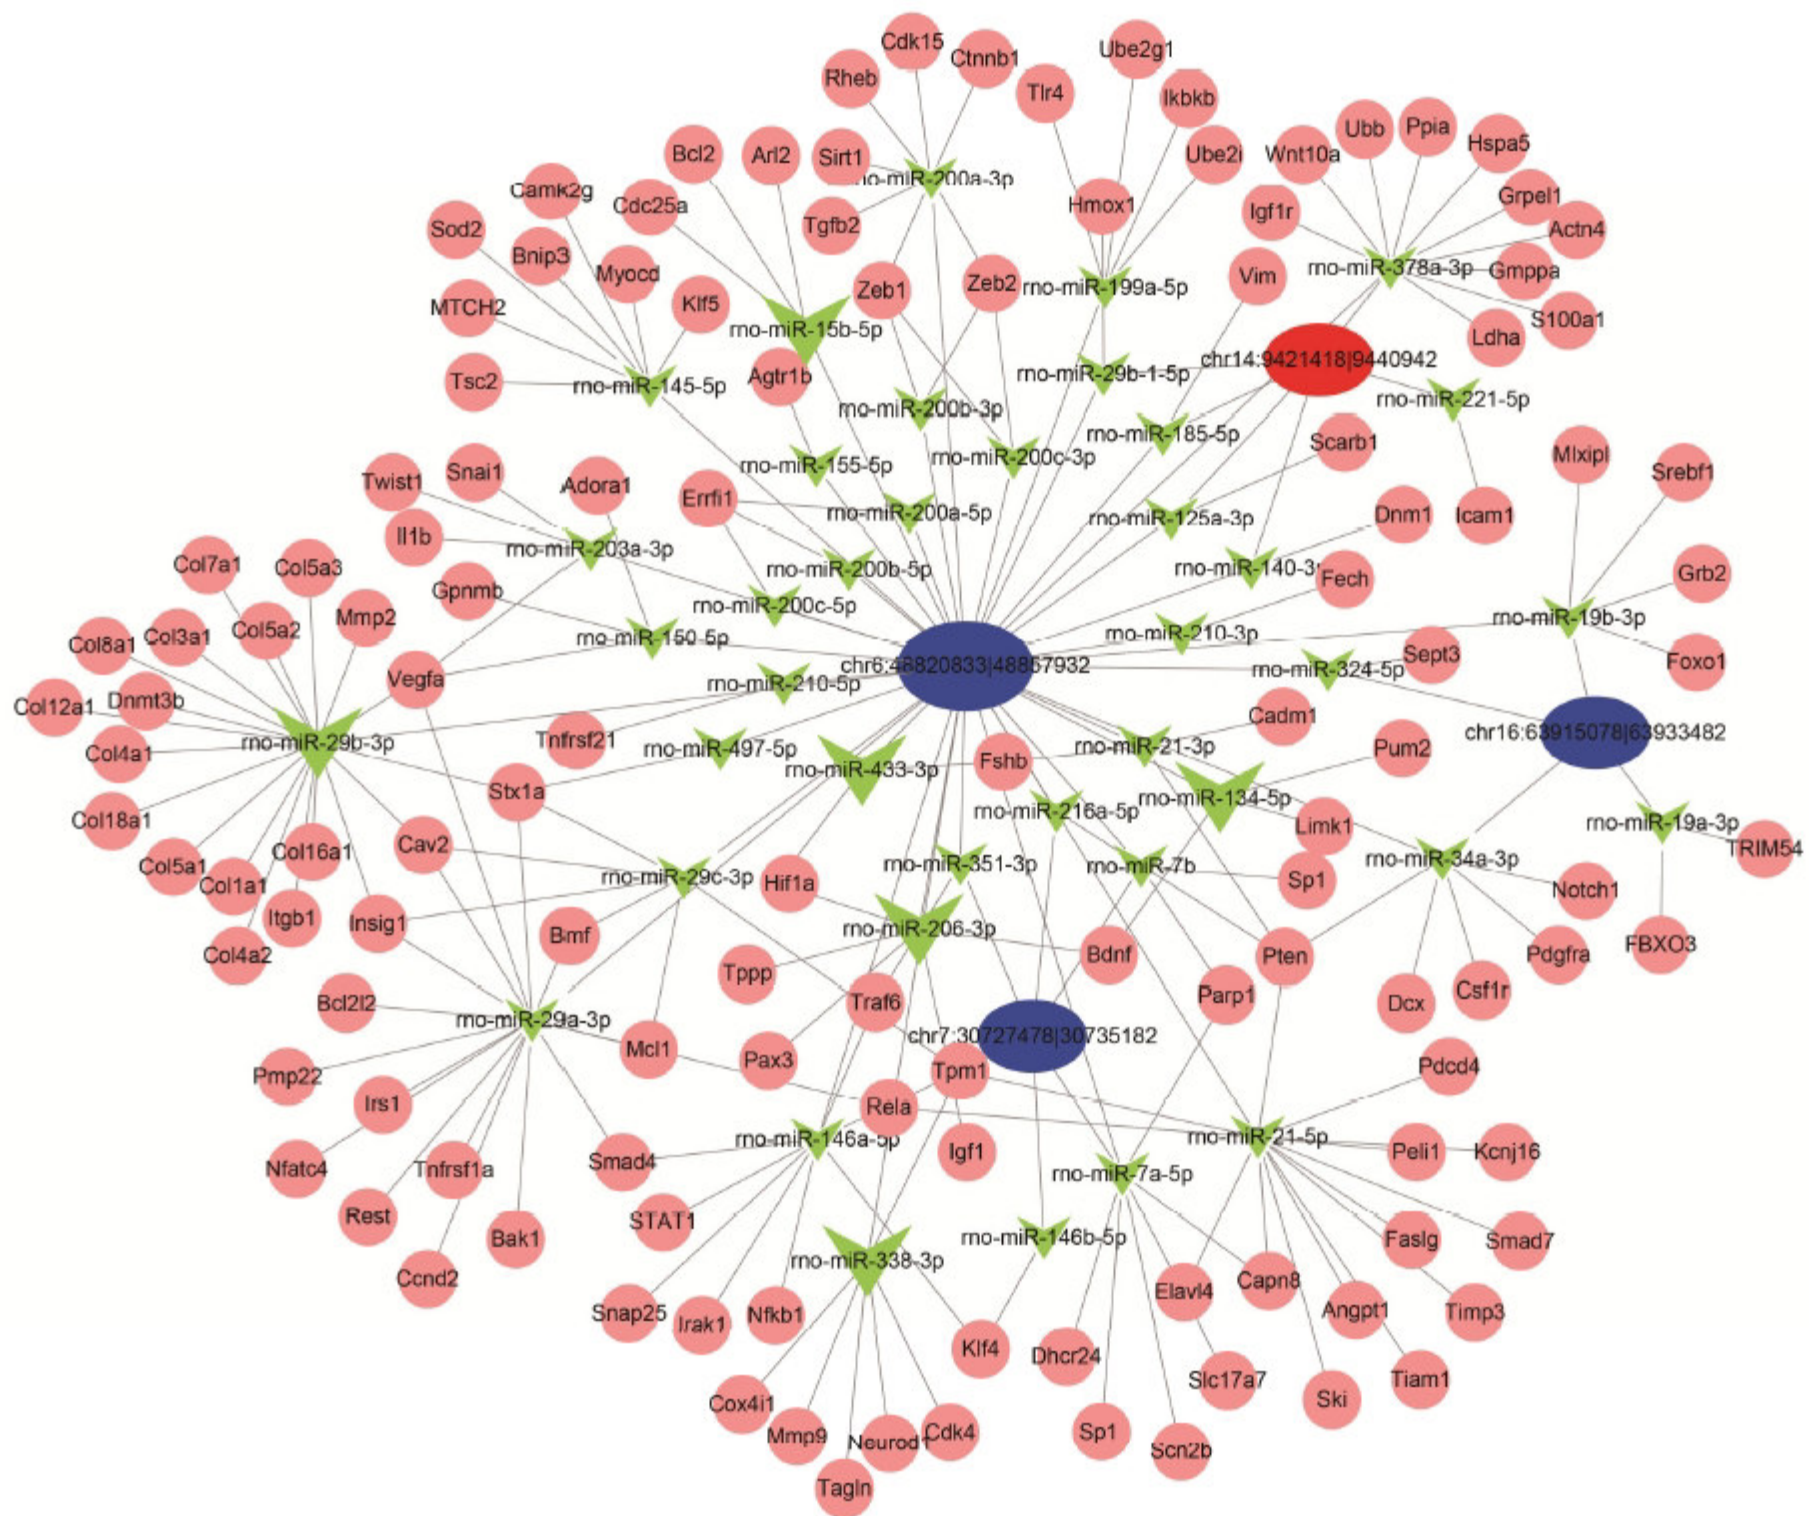

Supplement: Supplementary file 1 [file 13169897]
